# Supplementary material for: NiII–Schiff base complex as an enzyme inhibitor of hen egg white lysozyme: a crystallographic and spectroscopic study
Source: Royal Society of Chemistry journal article supplement (doi:10.1039/c4mt00098f), 2014-06-24
Supplement: c4mt00098f1.pdf [file c4mt00098f1.pdf]

## Supplementary Information

For

### **Ni<sup>II</sup> - Schiff base complex as an enzyme inhibitor of hen egg white lysozyme: a crystallographic and spectroscopic study**

**Banabithi Koley Seth<sup>a</sup>, Aurkie Ray<sup>a</sup>, Sampa Biswas<sup>b</sup> and Samita Basu<sup>\*a</sup>**

*<sup>a</sup>Chemical Sciences Division, Saha Institute of Nuclear Physics, 1/AF Bidhannagar, Kolkata - 700064, India. Fax: +91-33-2337-4637; Telephone: +91-33-2337-5345; E-mail:*

*[samita.basu@saha.ac.in](mailto:samita.basu@saha.ac.in)*

*<sup>b</sup>Crystallography and Molecular biology, Saha Institute of Nuclear Physics, 1/AF Bidhannagar, Kolkata -700064, India. Fax: +91-33-2337-4637; Telephone: +91-33-2337-5345; E-mail:*

*[sampa.biswas@saha.ac.in](mailto:sampa.biswas@saha.ac.in)*

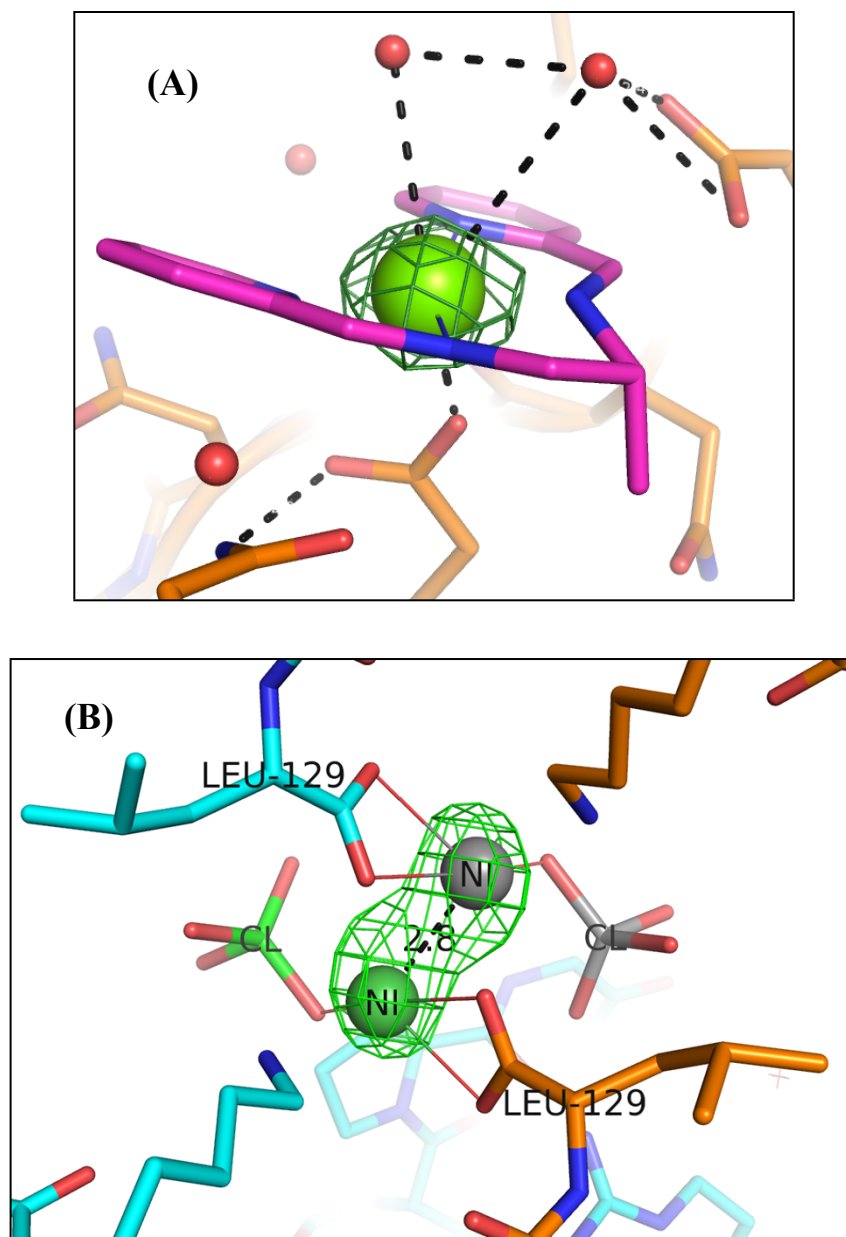

Fig.S1. Anomalous map of nickel atoms; A) Nickel in the NSC at 6.5  $\sigma$ ; B) Free nickel atom (at 4  $\sigma$ ) near the C terminus end (Leu 129) of the lysozyme molecule. The chlorine and the oxygen ion of the perchlorate molecule and the nickel ion of the asymmetric unit are represented as green, orange and green respectively and those of the symmetry related molecule are represented by grey, orange and grey respectively.

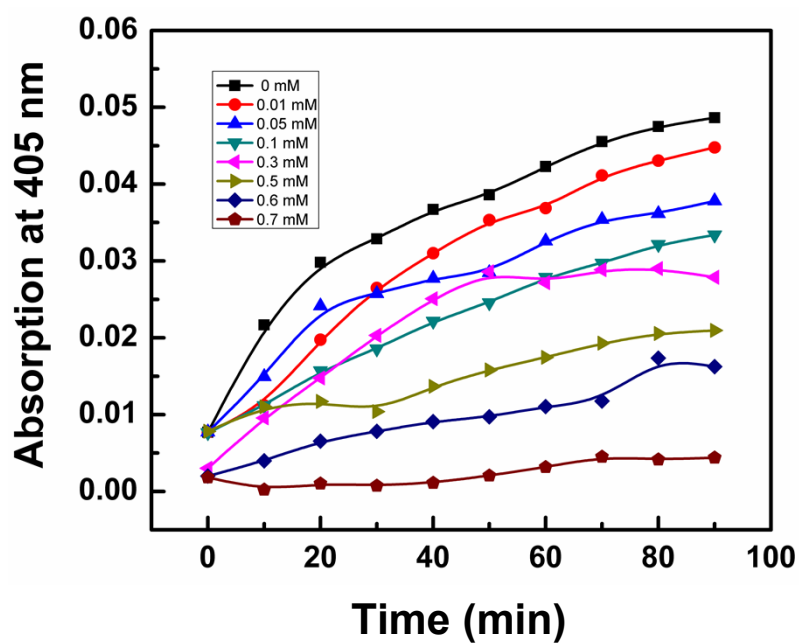

Fig.S2. Sensitivity of the lysozyme enzyme activity (0.6 mg/mL) in absence and presence of NSC (0 to 0.7 mM) against p-(GlcNAc)<sub>3</sub> substrate (1.6 mM) at acetate buffer medium (pH 5) at 37°C. The color intensity of liberated p-nitrophenol at 405 nm has been measured as described in the text.
